# Supplementary material
Source: PubMed Central journal article supplement (PMC5241251)
Supplement: NIHMS808615-supplement-1.pdf [file NIHMS808615-supplement-1.pdf]

## **Supplemental Materials**

### **Individualized Molecular Analyses Guide Efforts (IMAGE): A Prospective Study of Molecular Profiling of Tissue and Blood in Metastatic Triple Negative Breast Cancer**

Heather A. Parsons, MD MPH\*<sup>1,#</sup>; Julia A. Beaver, MD\*<sup>1</sup>; Ashley Cimino-Mathews, MD<sup>1</sup>; Siraj M. Ali, MD PhD<sup>2</sup>; Jennifer Axilbund, MS, CGC<sup>1</sup>; David Chu<sup>1</sup>, Roisin M. Connolly, MBBS<sup>1</sup>; Rory L. Cochran, PhD<sup>1</sup>; Sarah Croessmann, PhD<sup>1</sup>; Travis Clark, PhD<sup>2</sup>; Christopher Gocke, MD<sup>1</sup>; Stacie Jeter<sup>1</sup>; Mark Kennedy, PhD<sup>2</sup>; Josh Lauring, MD, PhD<sup>1</sup>; Justin Lee<sup>1</sup>; Doron Lipson, PhD<sup>2</sup>; Vincent A. Miller, MD<sup>2</sup>; Geoff A. Otto, PhD<sup>2</sup>; Gary L. Rosner, ScD<sup>1</sup>; Jeffrey S. Ross, MD<sup>2</sup>, Shannon Slater<sup>1</sup>; Phil J. Stephens, PhD<sup>2</sup>; Dustin A. VanDenBerg<sup>1</sup>; Antonio C. Wolff, MD<sup>1</sup>; Lauren E. Young, MS<sup>2</sup>; Daniel J. Zabransky<sup>1</sup>; Zhe Zhang, MS<sup>1</sup>; Jane Zorzi, RN, BSN<sup>1</sup>; Vered Stearns, MD<sup>1&</sup>; and Ben H. Park, MD, PhD<sup>1&</sup> (\*These authors contributed equally to this study, &These authors contributed equally to this study)

<sup>1</sup>The Sidney Kimmel Comprehensive Cancer Center, Johns Hopkins University School of Medicine, Baltimore, MD; <sup>2</sup>Foundation Medicine Inc., Cambridge, MA. <sup>#</sup>*Current Affiliation*: Susan F. Smith Center for Women's Cancers, Breast Oncology Program, Dana-Farber Cancer Institute, Harvard Medical School, Boston, MA.

*Corresponding authors*: Ben H. Park and Vered Stearns, The Sidney Kimmel Comprehensive Cancer Center at Johns Hopkins, 1650 Orleans Street, Baltimore, MD 21287, e-mail: [bpark2@jhmi.edu](mailto:bpark2@jhmi.edu), [vstearns1@jhmi.edu](mailto:vstearns1@jhmi.edu)

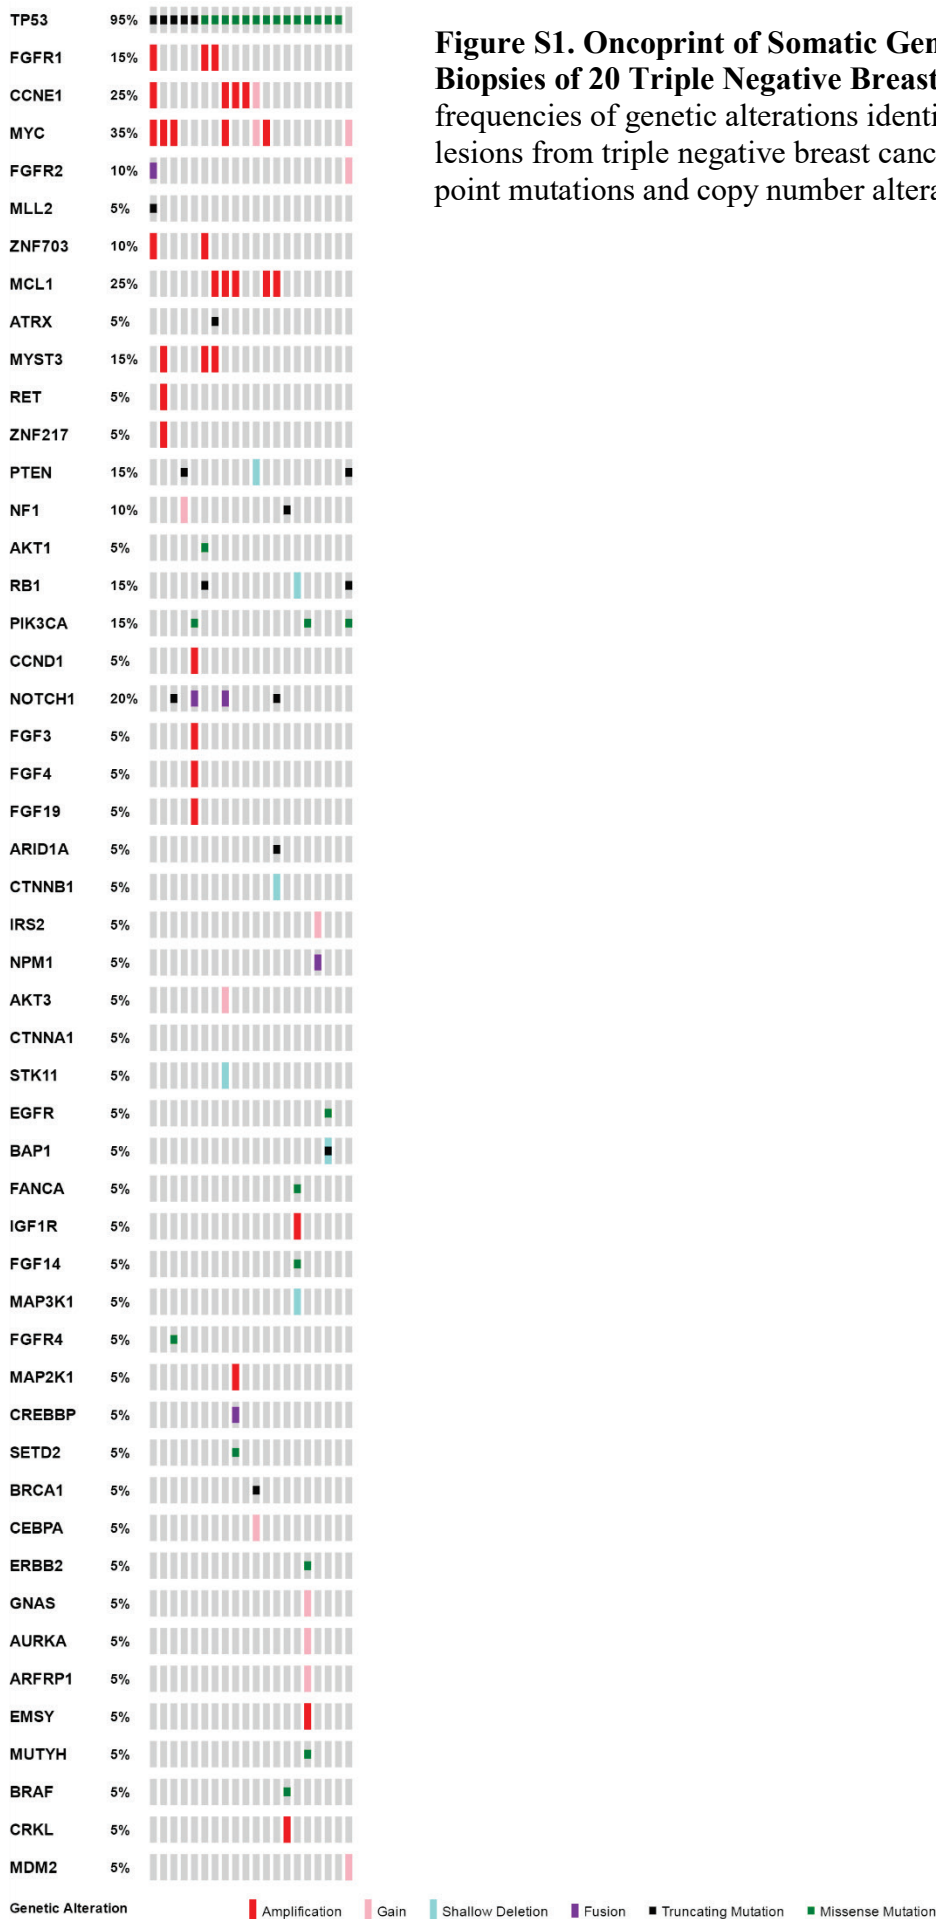

**Figure S1. Oncoprint of Somatic Genomic Alterations in Metastatic Biopsies of 20 Triple Negative Breast Cancers.** Shown are the frequencies of genetic alterations identified by NGS in the 20 metastatic lesions from triple negative breast cancer patients. Alterations include point mutations and copy number alterations as shown in the key below.

**Table S1. Characteristics of genomic alterations from metastatic tumor biopsies**

| Patient | Gene   | Alteration    | Type       | Tumor Allele Frequency(%) |
|---------|--------|---------------|------------|---------------------------|
| 1       | TP53   | R342*         | TRUNCATION | 63                        |
| 1       | FGFR1  | AMP           | CNA        | NA                        |
| 1       | CCNE1  | AMP           | CNA        | NA                        |
| 1       | MYC    | AMP           | CNA        | NA                        |
| 1       | FGFR2  | FUSION        | FUSION     | NA                        |
| 1       | MLL2   | G2863fs*13    | TRUNCATION | 42                        |
| 1       | ZNF703 | AMP           | CNA        | NA                        |
| 2       | TP53   | Y163C         | MISSENSE   | 60                        |
| 2       | FGFR1  | AMP           | CNA        | NA                        |
| 2       | MCL1   | AMP           | CNA        | NA                        |
| 2       | ATRX   | R418*         | TRUNCATION | 17                        |
| 2       | MYST3  | AMP           | CNA        | NA                        |
| 3       | TP53   | M66fs*57      | TRUNCATION | 77                        |
| 3       | RET    | AMP           | CNA        | NA                        |
| 3       | MYC    | AMP           | CNA        | NA                        |
| 3       | ZNF217 | AMP           | CNA        | NA                        |
| 3       | MYST3  | AMP           | CNA        | NA                        |
| 5       | TP53   | R209fs*6      | TRUNCATION | 21                        |
| 5       | PTEN   | T319fs*6      | TRUNCATION | 7                         |
| 5       | PTEN   | Y188fs*2      | TRUNCATION | 15                        |
| 5       | NF1    | GAIN          | CNA        | NA                        |
| 6       | TP53   | R175H         | MISSENSE   | 43                        |
| 6       | FGFR1  | AMP           | CNA        | NA                        |
| 6       | AKT1   | E17K          | MISSENSE   | 42                        |
| 6       | RB1    | SPLICE        | SPLICE     | 36                        |
| 6       | ZNF703 | AMP           | CNA        | NA                        |
| 6       | MYST3  | AMP           | CNA        | NA                        |
| 7       | TP53   | R248Q         | MISSENSE   | 74                        |
| 7       | MCL1   | AMP           | CNA        | NA                        |
| 7       | MYC    | AMP           | CNA        | NA                        |
| 8       | TP53   | Y234C         | MISSENSE   | 18                        |
| 8       | CCNE1  | AMP           | CNA        | NA                        |
| 9       | TP53   | P219fs*2      | TRUNCATION | 50                        |
| 9       | PIK3CA | V344G         | MISSENSE   | 63                        |
| 9       | CCND1  | AMP           | CNA        | NA                        |
| 9       | NOTCH1 | NOTCH1-SEC16A | FUSION     | NA                        |
| 9       | FGF3   | AMP           | CNA        | NA                        |
| 9       | FGF4   | AMP           | CNA        | NA                        |
| 9       | FGF19  | AMP           | CNA        | NA                        |
| 10      | TP53   | R249W         | MISSENSE   | 4                         |
| 13      | TP53   | Y163C         | MISSENSE   | 72                        |
| 13      | MCL1   | AMP           | CNA        | NA                        |
| 13      | NOTCH1 | L2446fs*28    | TRUNCATION | 76                        |

|    |         |                |            |    |
|----|---------|----------------|------------|----|
| 13 | ARID1A  | L1176fs*17     | TRUNCATION | 66 |
| 13 | CTNNB1  | HOMDEL         | CNA        | NA |
| 14 | TP53    | T157_R158insRA | MISSENSE   | 11 |
| 14 | IRS2    | GAIN           | CNA        | NA |
| 14 | NPM1    | ZNF573-NPM1    | FUSION     | NA |
| 16 | TP53    | Y234DEL        | MISSENSE   | 64 |
| 16 | MCL1    | AMP            | CNA        | NA |
| 16 | CCNE1   | AMP            | CNA        | NA |
| 16 | AKT3    | GAIN           | CNA        | NA |
| 16 | MYC amp | AMP            | CNA        | NA |
| 16 | NOTCH1  | BARHL1-NOTCH1  | FUSION     | NA |
| 16 | CTNNA1  | SPLICE         | SPLICE     | 42 |
| 17 | TP53    | A276G          | MISSENSE   | 39 |
| 17 | EGFR    | R108K          | MISSENSE   | 38 |
| 17 | BAP1    | E498fs*38      | TRUNCATION | 19 |
| 17 | BAP1    | HOMDEL         | CNA        | NA |
| 19 | TP53    | P58fs*65       | TRUNCATION | 13 |
| 19 | TP53    | Y163C          | MISSENSE   | 12 |
| 19 | FANCA   | T1161M         | MISSENSE   | 12 |
| 19 | IGF1R   | AMP            | CNA        | NA |
| 19 | FGF14   | A236V          | MISSENSE   | 27 |
| 19 | MAP3K1  | HOMDEL         | CNA        | NA |
| 19 | RB1     | HOMDEL         | CNA        | NA |
| 20 | TP53    | E221fs*4       | TRUNCATION | 56 |
| 20 | FGFR4   | D425N          | MISSENSE   | 18 |
| 20 | MYC     | AMP            | CNA        | NA |
| 20 | NOTCH1  | ex 34          | TRUNCATION | NA |
| 21 | TP53    | N247K          | MISSENSE   | 46 |
| 21 | TP53    | R175H          | MISSENSE   | 4  |
| 21 | TP53    | T253N          | MISSENSE   | 43 |
| 21 | MAP2K1  | AMP            | CNA        | NA |
| 21 | CCNE1   | AMP            | CNA        | NA |
| 21 | MCL1    | AMP            | CNA        | NA |
| 21 | CREBBP  | TRAP1-CREBBP   | FUSION     | NA |
| 21 | SETD2   | T2354A         | MISSENSE   | 39 |
| 22 | TP53    | P151R          | MISSENSE   | 14 |
| 22 | PTEN    | HOMDEL         | CNA        | NA |
| 22 | CCNE1   | GAIN           | CNA        | NA |
| 22 | BRCA1   | E23fs*17       | TRUNCATION | 55 |
| 22 | MYC     | GAIN           | CNA        | NA |
| 22 | CEBPA   | GAIN           | CNA        | NA |
| 23 | TP53    | R273H          | MISSENSE   | 41 |
| 23 | ERBB2   | D769H          | MISSENSE   | 54 |
| 23 | ERBB2   | V777L          | MISSENSE   | 55 |
| 23 | PIK3CA  | M1043V         | MISSENSE   | 41 |
| 23 | GNAS    | GAIN           | CNA        | NA |

|    |             |                    |            |    |
|----|-------------|--------------------|------------|----|
| 23 | AURKA       | GAIN               | CNA        | NA |
| 23 | ARFRP1      | GAIN               | CNA        | NA |
| 23 | EMSY        | AMP                | CNA        | NA |
| 23 | MUTYH       | G382D              | MISSENSE   | 55 |
| 25 | TP53        | V157F              | MISSENSE   | 30 |
| 25 | NF1         | S436*              | TRUNCATION | 22 |
| 25 | BRAF        | G469R              | MISSENSE   | 12 |
| 25 | CRKL        | AMP                | CNA        | NA |
| 26 | PIK3CA      | M1043I             | MISSENSE   | 18 |
| 26 | PIK3CA      | N1044K             | MISSENSE   | 18 |
| 26 | PTEN        | C296fs*12          | TRUNCATION | 23 |
| 26 | FGFR2       | GAIN               | CNA        | NA |
| 26 | MDM2<br>amp | GAIN               | CNA        | NA |
| 26 | MYC amp     | GAIN               | CNA        | NA |
| 26 | RB1         | 1434_1498+49del114 | SPLICE     | 6  |

**CNA=copy number alteration, NA=not applicable**
